# Supplementary material for: Fundamentals of fast-scan cyclic voltammetry for dopamine detection
Source: Royal Society of Chemistry journal article supplement (doi:10.1039/c9an01586h), 2019-12-26
Supplement: c9an01586h1.pdf [file c9an01586h1.pdf]

Electronic Supplementary Information

**Fundamentals of Fast-Scan Cyclic Voltammetry for Dopamine  
Detection**

B. Jill Venton\* and Qun Cao

Dept. of Chemistry, University of Virginia, PO Box 400319, Charlottesville, VA 22901

## **Experimental Details**

### Cyclic voltammetry

Cyclic voltammetry was performed at Gamry Reference 600 (Gamry Instruments, Warminster, PA) A three electrode system was used, the working electrode was glassy carbon (CH Instruments, Inc. Austin, TX), the reference electrode was a standard Ag/AgCl electrode, and the counter electrode was a Pt wire. A waveform scanned from -0.2 V to 0.6 V was used for dopamine at a scan rate of 100 mV/s in a phosphate-buffered saline (PBS) (131.25 mM NaCl, 3.00 mM KCl, 10 mM NaH<sub>2</sub>PO<sub>4</sub>, 1.2 mM MgCl<sub>2</sub>, 2.0 mM Na<sub>2</sub>SO<sub>4</sub>, and 1.2 mM CaCl<sub>2</sub> with pH adjusted to 7.4) to the desired concentration.

### Fast-scan cyclic voltammetry

Fast-scan cyclic voltammetry were conducted using a two-electrode system. T-650 carbon fiber (7 μm diameter, Cytec Engineering Materials, West Paterson, NJ) was the working electrode and Ag/AgCl was the reference electrode. The electrodes were connected to a ChemClamp potentiostat and headstage (Dagan, Minneapolis, MN) and HDCV software (UNC Chapel Hill). Unless specified, a triangle waveform was used with a holding potential of -0.4 V, switching potential of +1.3 V, scan rate of 400 V/s, and repetition frequency of 10 Hz. The PBS buffer and test solutions were injected with flow cell (Harvard Apparatus, Holliston, MA) at a flow rate of 2 mL/min.
